# Supplementary material
Source: publisher figshare collection journal article supplement (https://diabetesjournals.figshare.com/articles/dataset/_/25848208)
Supplement: Supplementary file 1 [file 1]

Supplemental figure 1.

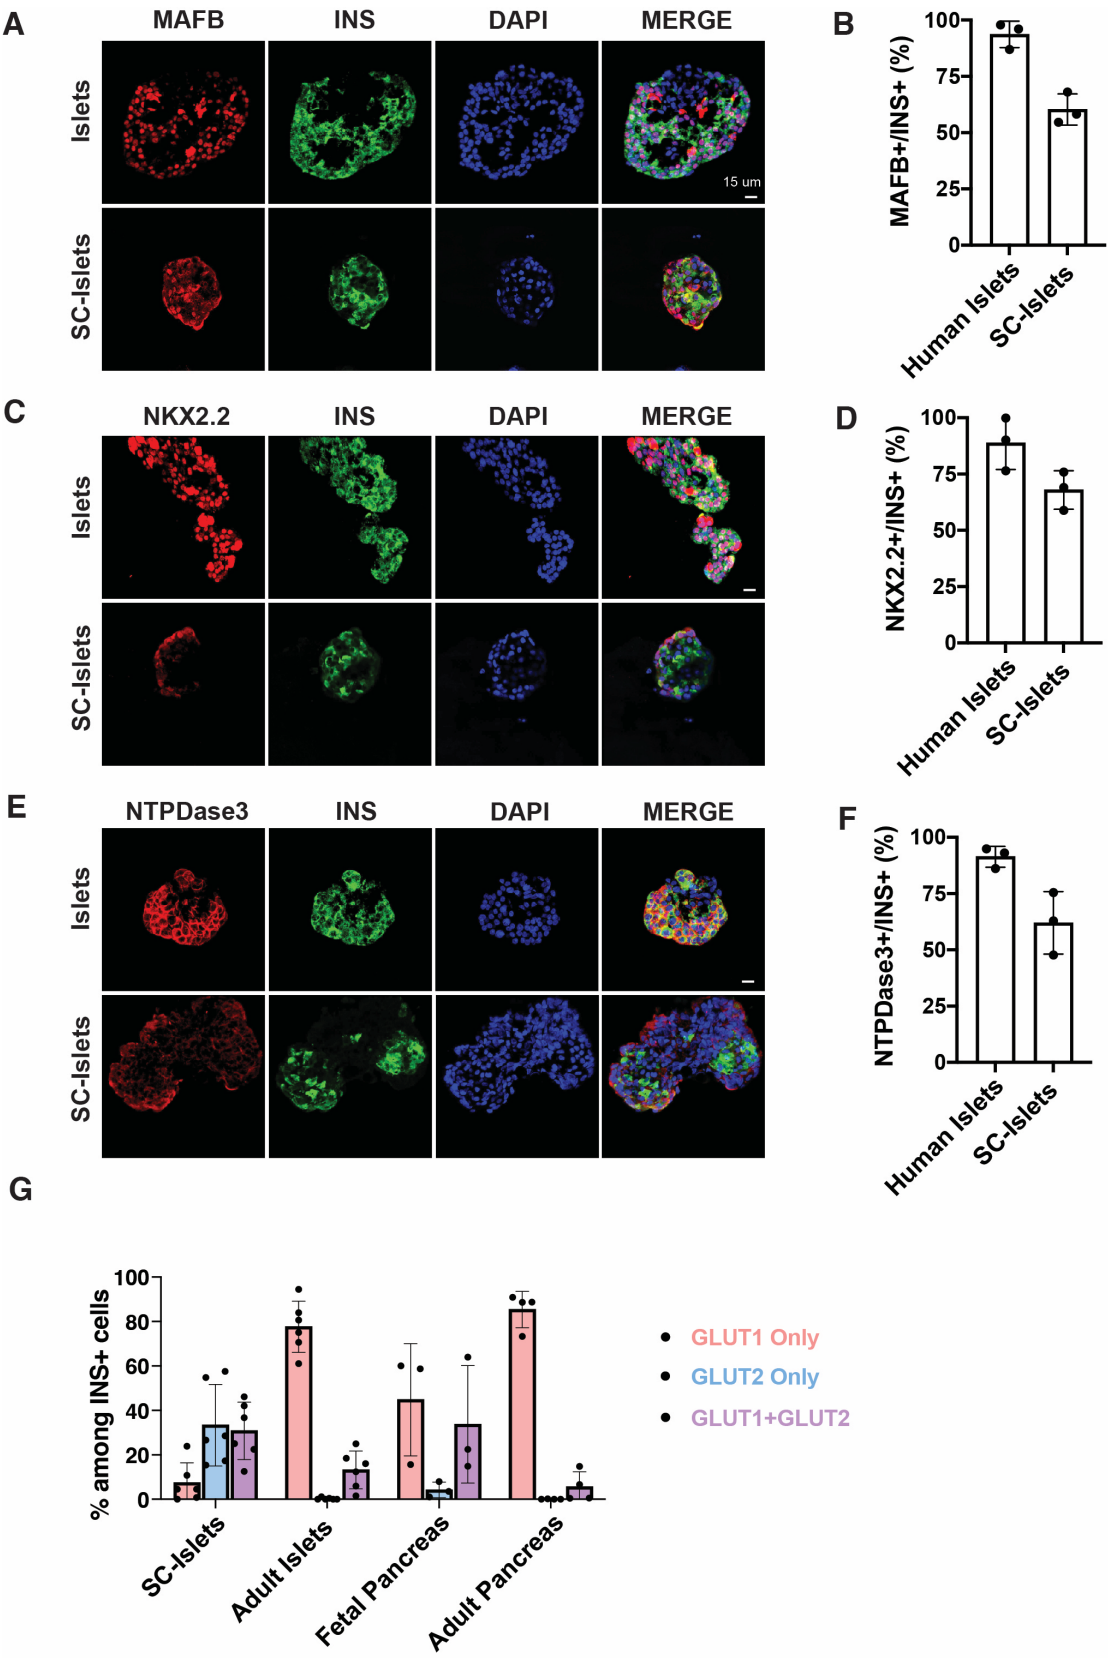

**Supplemental Figure 1.  $\beta$  cell maturation markers.** Representative image of MAFA (A) NKX2.2 (C) and NTPDase3 (E) expression in human islets and SC-islets. Quantification of MAFA (B) NKX2.2 (D) and NTPDase3 (F) positive population within INS<sup>+</sup> cell population. Human islets and SC-islets data was quantified based on images taken from n=3 sperate human islet donors and n=3 SC-islets differentiations. Scale bar is 15 $\mu$ m. Data are mean  $\pm$  SD. (G) GLUT1 and GLUT2 expression distribution in INS<sup>+</sup> cells of SC-islets differentiations (n=6), human adult islet donor (n=6), fetal pancreas donors (n=3) and adult pancreas donors (n=4). Data are mean  $\pm$  SD. This data is represented in Figure 1C,D,F,G.

## Supplemental figure 2.

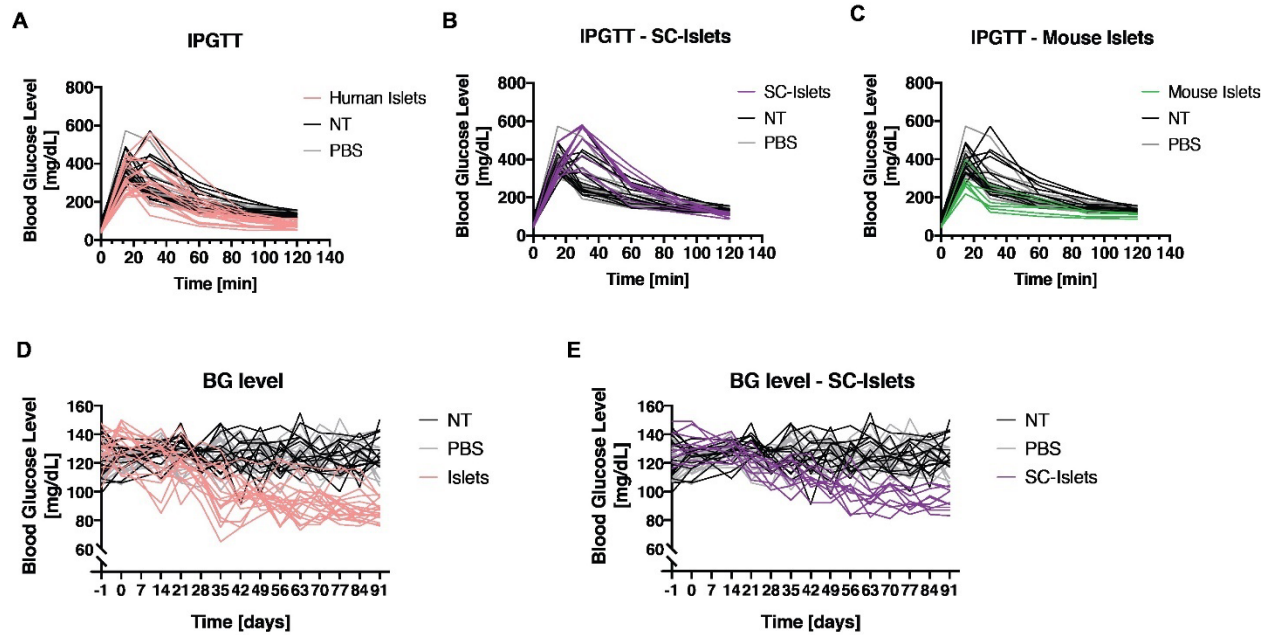

### Supplemental Figure 2. BG levels of human islets and SC-islet transplanted mice. (A)

Individual traces of IPGTT BG levels of NT, PBS, and human islets transplanted mice. (B)

Individual traces of IPGTT BG levels of NT, PBS, and SC-islets transplanted mice. (C)

Individual traces of IPGTT BG levels of NT, PBS, and mouse islets transplanted mice. (D)

Individual traces of non-fasting BG levels of NT, PBS and human islets transplanted mice. Day 0 indicates day of surgery. (E) Individual traces of non-fasting BG levels of NT, PBS and SC-islets cells transplanted mice. Day 0 indicates day of surgery.

### Supplemental figure 3.

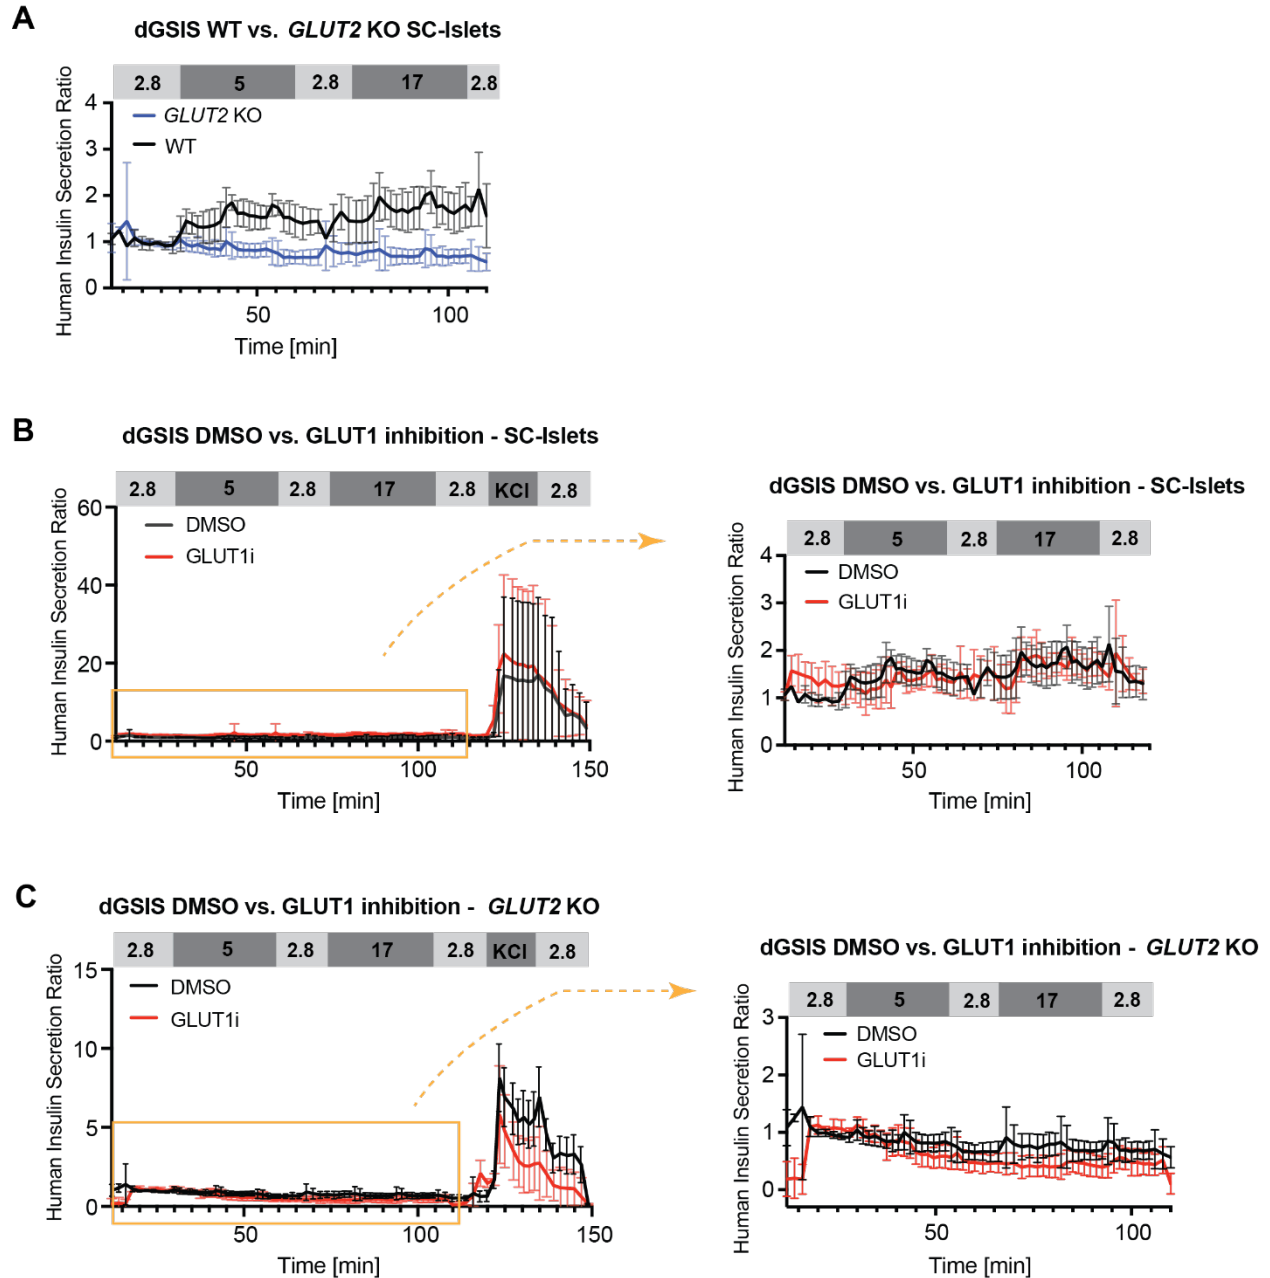

**Supplemental Figure 3. dGSIS of SC-Islets.** (A) dGSIS plots of WT and *GLUT2* KO SC-islets. (B-C) dGSIS plots of (B) WT SC-islets and (C) *GLUT2* KO SC-islets with and without *GLUT1* inhibitor *GLUT2* KO SC-islets. Left plot displays the full dGSIS sequence. Orange box marks area of zoom-in shown on the right. (n=6 for both WT and *GLUT2* KO cells, from 3 different differentiations). Protocol of glucose concentration and exposure duration is indicated in the grey bar above each plot. Numbers indicate glucose concentration use in the specified time.

Supplemental figure 4.

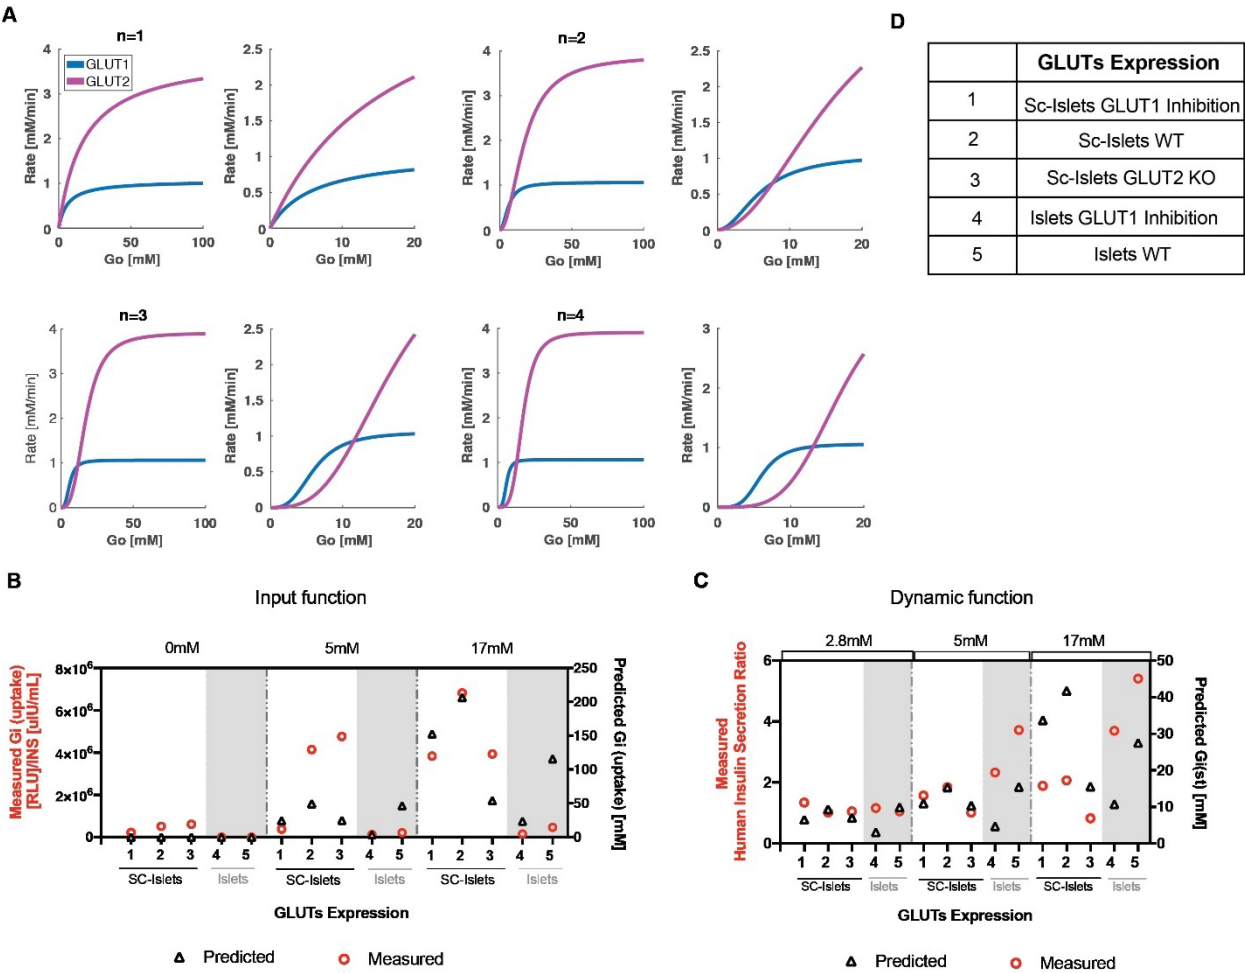

**Supplemental Figure 4. Mathematical model validation.** (A) Rate prediction based on different values of the Hill coefficient ( $n$ ) between the values of 1-4.  $G_o$  is the extracellular concentration of glucose. Left plot displays a wide range of  $G_o$  between 0 to 100 mM. Box indicates the zoom-in area of the right plot at a narrower  $G_o$  range (0-20 mM). (B-C) Individual values of predicted vs. measured results of (B) human islets and (C) SC-islets. Numbers legend in D. (D) GLUT1 and GLUT2 disruption states legend for B and C.
