# Supplementary material
Source: publisher figshare collection journal article supplement (https://diabetesjournals.figshare.com/articles/dataset/_/25848208)
Supplement: Supplementary file 2 [file 1]

## Supplemental Tables

**Supplemental Table 1. Islet donor information**

| Donor # | Sex    | Age (years) | BMI (Kg/m <sup>2</sup> ) | HbA1c % (mmol/mol) | Average blood glucose (mg/dl) |
|---------|--------|-------------|--------------------------|--------------------|-------------------------------|
| 1       | Male   | 39          | 27.6                     | 5.5 (37)           | 125.4                         |
| 2       | Female | 28          | 24.7                     | 5 (31)             | 165.4                         |
| 3       | Male   | 66          | 29.9                     | 5.8 (40)           | 163.8                         |
| 4       | Female | 62          | 23                       | 5 (31)             | 114.4                         |
| 5       | Male   | 53          | 31.1                     | 5.9 (41)           | 165.4                         |
| 6       | Male   | 29          | 23.1                     | 5.3 (34)           | 158.8                         |
| 7       | Male   | 49          | 32.5                     | 5.5 (37)           | 138.6                         |
| 8       | Male   | 44          | 25.8                     | 6 (42)             | 133.2                         |
| 9       | Male   | 52          | 25.4                     | 4.2 (22)           | 246.2                         |
| 10      | Male   | 61          | 22.4                     | 5.2 (33)           | 187.4                         |
| 11      | Male   | 48          | 19                       | 5.3 (34)           | 123.8                         |
| 12      | Female | 21          | 30                       | 5.4 (36)           | 101.2                         |
| 13      | Male   | 36          | 29.6                     | 5.4 (36)           | 172                           |
| 14      | Male   | 39          | 32.4                     | 4.2 (22)           | 180.4                         |
| 15      | Male   | 52          | 37.5                     | 5.3 (34)           | 181                           |

**Supplemental Table 2. Pancreas donor information**

| Developmental stage | Age                  | Sex     |
|---------------------|----------------------|---------|
| <b>Fetal</b>        | 19 gestational weeks | Male    |
|                     | 19 gestational weeks | Unknown |
|                     | 22 gestational weeks | Unknown |
|                     | 17 gestational weeks | Female  |
| <b>Adult</b>        | 46 years old         | Male    |
|                     | 42 years old         | Male    |
|                     | 24 years old         | Female  |
|                     | 35 years old         | Male    |

**Supplemental Table 3. List of primary and secondary antibodies**

| Primary Antibody    | Company        | Cat#      | Use (dilution)        |
|---------------------|----------------|-----------|-----------------------|
| Anti-Insulin        | Abcam          | Ab181547  | Western Blot (1:500)  |
| Anti-GLUT1          | Invitrogen     | PA5-16793 | Western Blot (1:1000) |
| Anti-GLUT2          | R&D            | MAB1414   | Western Blot (1:1000) |
| Anti-GAPDH          | Cell Signaling | 5174S     | Western Blot (1:5000) |
| Anti-mouse IgG HRP  | Cell Signaling | 7076S     | Western Blot (1:5000) |
| Anti-rabbit IgG HRP | Cell Signaling | 7074S     | Western Blot (1:5000) |

|                                                                                           |                              |             |                                                                                                 |
|-------------------------------------------------------------------------------------------|------------------------------|-------------|-------------------------------------------------------------------------------------------------|
| Anti-GLUT1                                                                                | Abcam                        | Ab652       | Immunostaining islets and SC-islets (1:200)<br>Immunostaining adults and fetal pancreas (1:100) |
| Anti-GLUT2                                                                                | R&D                          | MAB1414     | Immunostaining islets and SC-islets (1:200)<br>Immunostaining adults and fetal pancreas (1:100) |
| Anti-Insulin                                                                              | DakoCytomation               | A0564       | Immunostaining (1:500)                                                                          |
| Anti-MAFB                                                                                 | Sigma                        | HPA005653   | Immunostaining (1:50)                                                                           |
| Anti-NKX2.2                                                                               | Proteintech                  | 13013-1-AP  | Immunostaining (1:20)                                                                           |
| Anti-NTPDase3                                                                             | Ectonucleotidases antibodies | hN3-B3s     | Immunostaining (1:50)                                                                           |
| Anti-Insulin                                                                              | Sigma-Aldrich                | I2018       | Immunostaining (1:5000)                                                                         |
| Anti-Glucagon                                                                             | Abcam                        | Ab 92517    | Immunostaining (1:1000)                                                                         |
| Anti-CPEP                                                                                 | DSHB                         | GN-ID4-c    | Flow Cytometry (1:500)                                                                          |
| Anti-NKX6.1                                                                               | DSHB                         | F55A 12-c   | Flow Cytometry (1:500)                                                                          |
| Anti-Glucagon                                                                             | Sigma                        | G2654       | Flow Cytometry (1:500)                                                                          |
| Anti-Somatostatin                                                                         | DakoCytomation               | A0566       | Flow Cytometry (1:500)                                                                          |
| <b>Secondary Antibody</b>                                                                 | <b>Company</b>               | <b>Cat#</b> | <b>Use (dilution)</b>                                                                           |
| Anti-rabbit IgG, HRP-linked Antibody                                                      | Cell Signaling               | 7074S       | Western Blot (1:5000)                                                                           |
| Anti-mouse IgG, HRP-linked Antibody                                                       | Cell Signaling               | 7076S       | Western Blot (1:5000)                                                                           |
| Goat anti-Guinea Pig IgG (H+L) Highly Cross-Adsorbed Secondary Antibody, Alexa Fluor™ 488 | Invitrogen                   | A11073      | Immunostaining (1:500)                                                                          |
| Donkey anti-Mouse IgG (H+L) Highly Cross-Adsorbed Secondary Antibody, Alexa Fluor™ 647    | Invitrogen                   | A31571      | Immunostaining (1:500)                                                                          |
| Goat anti-Rabbit IgG (H+L) Cross-Adsorbed Secondary Antibody, Alexa Fluor™ 568            | Invitrogen                   | A11011      | Immunostaining (1:500)<br>Flow Cytometry (1:500)                                                |

|                                                                                 |                 |         |                           |
|---------------------------------------------------------------------------------|-----------------|---------|---------------------------|
| Donkey Anti-Rat IgG(H+L),<br>Mouse SP ads-AF647                                 | SouthernBiotech | 6430-31 | Flow Cytometry<br>(1:500) |
| Goat anti-Mouse IgG1 Cross-<br>Adsorbed Secondary Antibody,<br>Alexa Fluor™ 488 | Invitrogen      | A21121  | Flow Cytometry<br>(1:500) |

**Supplemental Table 4. List of primers**

| <b>Name</b>         | <b>Sequence</b>         | <b>Purpose</b> |
|---------------------|-------------------------|----------------|
| SLC2A2_F            | GGACCTGCTCCCATTTTCTT    | PCR            |
| SLC2A2_R            | TCCCCCAAATCCTCTGTATG    | PCR            |
| SLC2A2_crispr_Seq_F | GCTCCCATTTTCTTTCCTAGTGG | Sequencing     |
| SLC2A2_crispr_Seq_R | TGCCTGTTTATTTCGCAGCTC   | Sequencing     |
